# Supplementary material for: A Targeted Epigenetic Clock for the Prediction of Biological Age
Source: MDPI journal article supplement (doi:10.3390/cells11244044), 2022-12-14
Supplement: s1 [file s1]

# Genomic region

# CpG units

ELOVL2

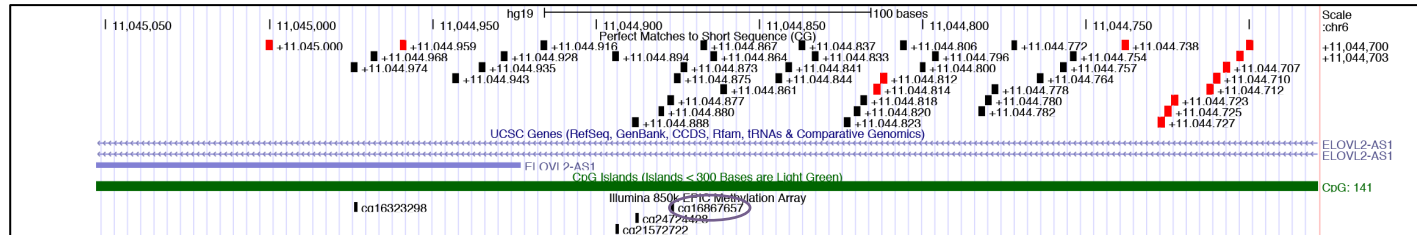

CpG\_2.3, CpG\_5, CpG\_6.7,  
CpG\_8, CpG\_9, CpG\_10,  
CpG\_11.12.13.14, CpG\_15.16.17,  
CpG\_18.19.20.21, CpG\_22.23.24,  
CpG\_27, CpG\_28.29,  
CpG\_30.31.32, CpG\_33,  
CpG\_34.35.36

NHLRC1

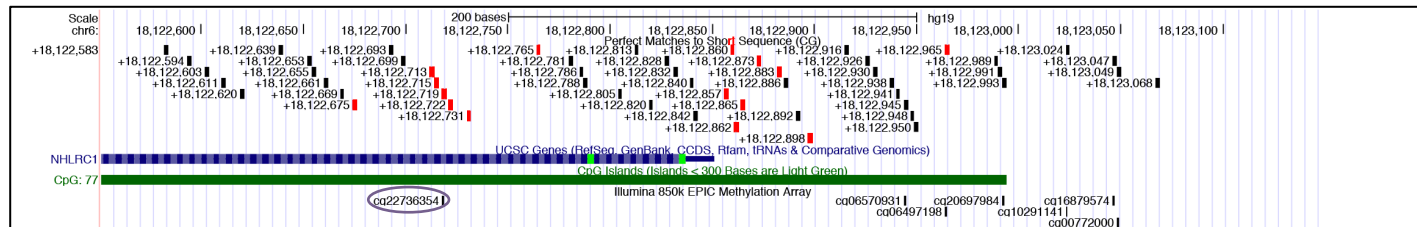

CpG\_1, CpG\_2.3, CpG\_4, CpG\_5,  
CpG\_6, CpG\_7.8.9, CpG\_10,  
CpG\_12.13, CpG\_20.21.22,  
CpG\_23.24.25, CpG\_26.27,  
CpG\_28.29, CpG\_36.37, CpG\_39,  
CpG\_40.41, CpG\_42.43,  
CpG\_44.45.46, CpG\_48.49.50,  
CpG\_51, CpG\_52.53, CpG\_54

SIRT7

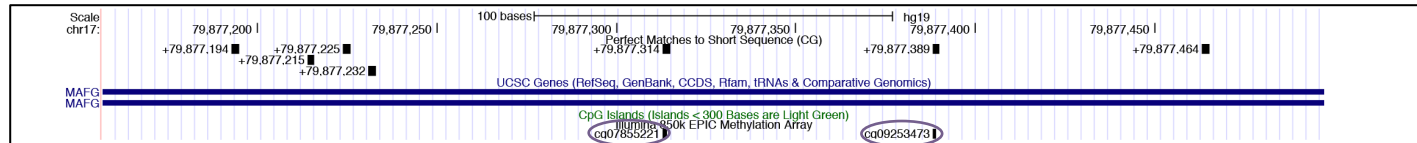

CpG\_1, CpG\_2, CpG\_3.4, CpG\_5,  
CpG\_6, CpG\_7

AIM2

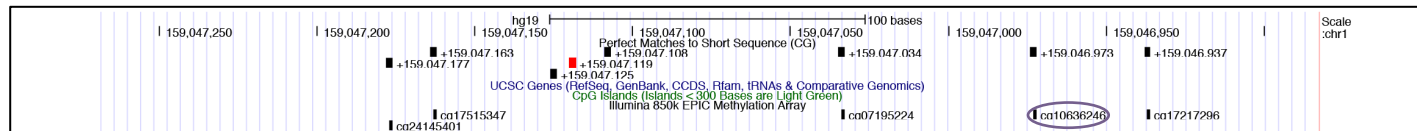

CpG\_1, CpG\_2, CpG\_3, CpG\_5,  
CpG\_6, CpG\_7, CpG\_8

EDARADD

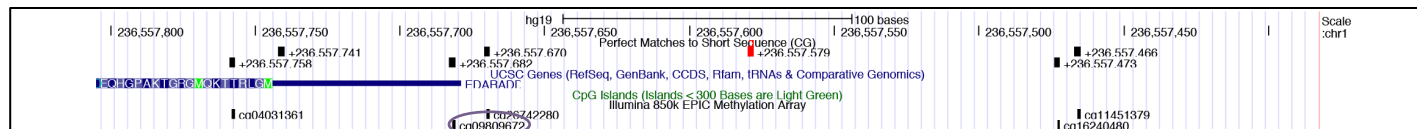

CpG\_1, CpG\_2, CpG\_3, CpG\_4,  
CpG\_6.7

TFAP2E

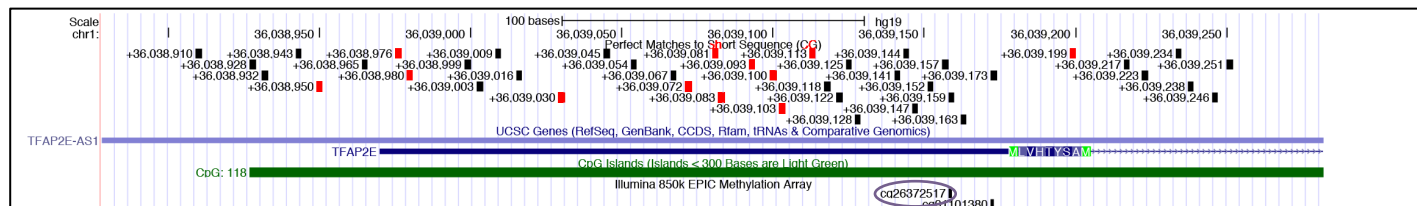

CpG\_1, CpG\_2.3, CpG\_4, CpG\_6,  
CpG\_9.10, CpG\_11, CpG\_12,  
CpG\_14.15, CpG\_16,  
CpG\_24.25.26.27, CpG\_28.29.30,  
CpG\_31.32.33.34, CpG\_35,  
CpG\_37.38, CpG\_39.40,  
CpG\_41.42
