# Supplementary material for: A Targeted Epigenetic Clock for the Prediction of Biological Age
Source: MDPI journal article supplement (doi:10.3390/cells11244044), 2022-12-14
Supplement: s1 [file s1]

**Supplementary Table S1.** Datasets used to select the Infinium CpG probes to be included in the targeted epigenetic assay.

| Dataset                                 | Group                   | N  | Age range (mean $\pm$ SD)          |
|-----------------------------------------|-------------------------|----|------------------------------------|
| Down syndrome Infinium 450k             | DS                      | 29 | 10-43 years<br>(25.62 $\pm$ 9.27)  |
|                                         | DSS                     | 29 | 9-52 years<br>(29.83 $\pm$ 10.90)  |
|                                         | DSM                     | 29 | 42-83 years<br>(58.97 $\pm$ 10.41) |
|                                         | Centenarians            | 28 | 101-112<br>(106.3 $\pm$ 2.73)      |
| Long-lived individuals<br>Infinium EPIC | Centenarians' offspring | 19 | 55-89<br>(71.42 $\pm$ 9.29)        |
|                                         | Controls                | 30 | 55-82<br>(71.91 $\pm$ 6.62)        |
|                                         |                         |    |                                    |

**Supplementary Table S2.** Datasets used to select the Infinium CpG probes to be included in the targeted epigenetic assay.

| Amplicon ID       | Forward primer                                                      | Reverse primer                    | Genomic Localization             |
|-------------------|---------------------------------------------------------------------|-----------------------------------|----------------------------------|
| <i>ELOVL2</i>     | AGGAAGAGAGGTAAATTTGCAGTAATACGACTCACTATA<br>TAGGAATAGAGTTATTTTT<br>T | GGGAGAAGGCTCCCTCTC<br>CCACAAAAACC | chr6:11,044,680-11,045,053       |
| <i>NHLRC1</i>     | TTGAGTTTAGGAGTTTATG<br>AGGTG                                        | AACAAAAACAATCCTATT<br>ATCCTCA     | chr6:18,122,552-18,123,149       |
| <i>SIRT7/MAFG</i> | GAGGGAGGTAGTAGGATACTTTAACCAAAACCAAATCT<br>ATATGG                    | CTCAA                             | chr17:79,877,158-79,877,497      |
| <i>AIM2</i>       | AAAATTTGGTTGATTGTTGA<br>TTTTT                                       | CAATACAAATTCTTATCTTC<br>AAAACA    | chr1:159,046,805-<br>159,047,299 |
| <i>EDARADD</i>    | TTTTTGGTGATTAGGAGTT<br>TTAGTG                                       | CAAAATTTCAAAAAACAAA<br>CCAAC      | chr1:236,557,384-<br>236,557,805 |
| <i>TFAP2E</i>     | TTATTATAATTGGAGTGTAT<br>GGAGTAGG                                    | ACAAAAAAATTAATAAAATC<br>CAACAC    | chr1:36,038,876-36,039,325       |
