# Supplementary material for: A Targeted Epigenetic Clock for the Prediction of Biological Age
Source: MDPI journal article supplement (doi:10.3390/cells11244044), 2022-12-14

**Italy**  
**p-value: 0.013**

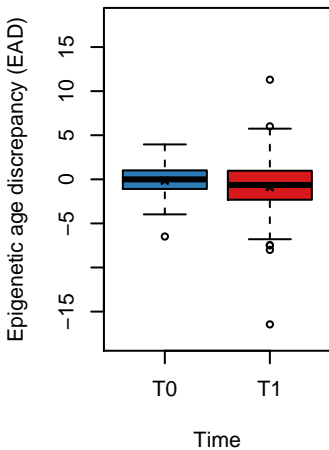

**Italy males**  
**p-value: 0.015**

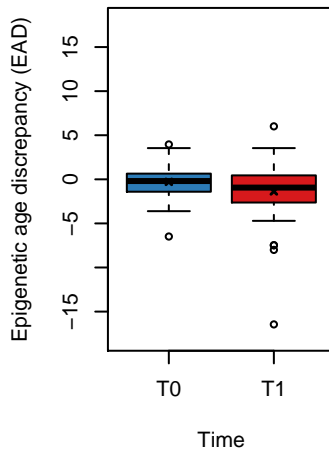

**Italy females**  
**p-value: 0.299**

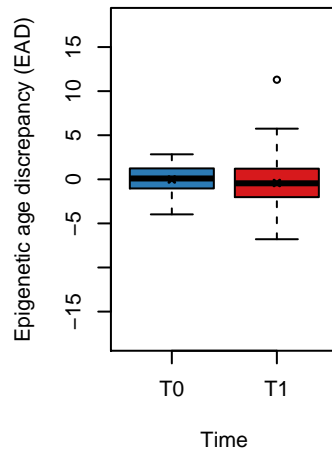

**Poland**  
**p-value: 0.201**

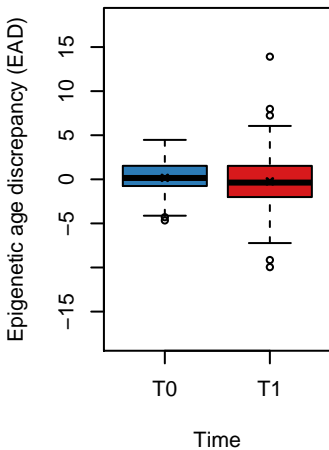

**Poland males**  
**p-value: 0.307**

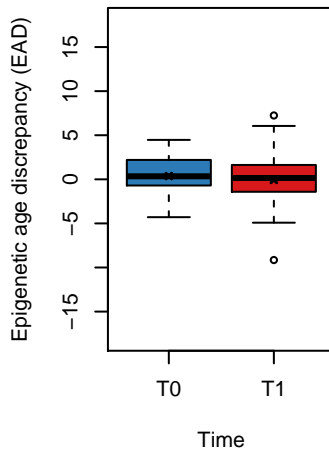

**Poland females**  
**p-value: 0.398**

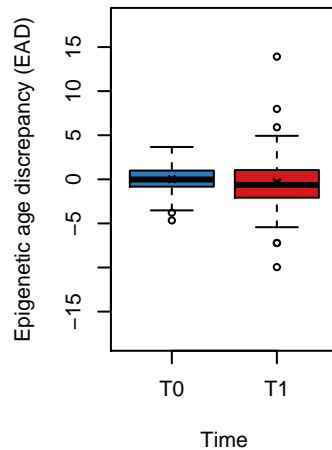

Supplement: s1 [file s1]
